# Supplementary material for: The Impact of Introducing Malaria Rapid Diagnostic Tests on Fever Case Management: A Synthesis of Ten Studies from the ACT Consortium
Source: PubMed Central journal article supplement (PMC5637593; doi:10.4269/ajtmh.16-0955), 2017-08-07
Supplement: tpmd160955.SD1.pdf [file tpmd160955.SD1.pdf]

SUPPLEMENTAL TABLE 1  
Patients tested by any malaria diagnostic test

| Study (by setting) | Without mRDT interventions percentage numerator/<br>denominator | With mRDT interventions percentage numerator/<br>denominator | Odds ratio (95% CI) |
|--------------------|-----------------------------------------------------------------|--------------------------------------------------------------|---------------------|
| Afgh1/a*           | NA                                                              | NA                                                           | NA                  |
| Afgh1/b*           | NA                                                              | NA                                                           | NA                  |
| Afgh1/c*           | NA                                                              | NA                                                           | NA                  |
| Afgh2/a            | 0                                                               | 98.8                                                         | ∞†                  |
|                    | 0/607                                                           | 724/733                                                      |                     |
| Afgh2/b            | 0                                                               | 100                                                          | ∞†                  |
|                    | 0/594                                                           | 466/466                                                      |                     |
| Cam1/a‡            | 78.3                                                            | (1): 70.7                                                    | (1): 0.67           |
|                    | 313/400                                                         | 494/699                                                      | (0.17, 2.66)        |
|                    | –                                                               | (2): 79.5                                                    | (2): 1.08           |
|                    | –                                                               | 617/776                                                      | (0.28, 4.1)         |
| Cam1/b‡            | 80.4                                                            | (1): 81.0                                                    | (1): 1.04           |
|                    | 226/281                                                         | 757/933                                                      | (0.23, 4.7)         |
|                    | –                                                               | (2): 77.8                                                    | (2): 0.85           |
|                    | –                                                               | 692/889                                                      | (0.15, 4.7)         |
| Ghan1/a*           | NA                                                              | NA                                                           | NA                  |
| Ghan1/b*           | NA                                                              | NA                                                           | NA                  |
| Nige1§             | 1.7                                                             | (1): 29.9                                                    | (1): 25.5           |
|                    | 27/1,634                                                        | 472/1,576                                                    | (7.5, 86)           |
|                    |                                                                 | (2): 23.2                                                    | (2): 18.0           |
|                    |                                                                 | 428/1,844                                                    | (5.0, 64)           |
|                    |                                                                 | (3): 15.8                                                    | (3): 11.2           |
|                    |                                                                 | 237/1,502                                                    | (3.08, 40)          |
| Tanz1/a            | 7.3                                                             | 48.4                                                         | 12.0                |
|                    | 50/689                                                          | 363/750                                                      | (4.2, 34.6)         |
| Tanz1/b            | 12.7                                                            | 43.1                                                         | 5.2                 |
|                    | 71/559                                                          | 167/387                                                      | (2.26, 12.0)        |
| Tanz1/c            | 31.3                                                            | 71.5                                                         | 5.5                 |
|                    | 156/498                                                         | 409/572                                                      | (2.30, 13.2)        |
| Tanz2              | 0                                                               | (1): 39.1                                                    | ∞†                  |
|                    | 0/16,068                                                        | 5,556/14,216                                                 |                     |
|                    |                                                                 | (2): 39.7                                                    |                     |
|                    |                                                                 | 6,332/15,931                                                 |                     |
|                    |                                                                 | (3): 40.6                                                    |                     |
|                    |                                                                 | 5,673/13,972                                                 |                     |
| Uga1               | 7.3                                                             | 52.9                                                         | 14.4                |
|                    | 15,285/210,758                                                  | 117,350/221,755                                              | (6.1, 33.9)         |
| Uga2/a             | 0                                                               | 96.0                                                         | ∞†                  |
|                    | 0/10,625                                                        | 1,150/1,198                                                  |                     |
| Uga2/b             | 0                                                               | 98.7                                                         | ∞†                  |
|                    | 0/2,444                                                         | 7,736/7,840                                                  |                     |
| Uga3               | 0                                                               | 97.3                                                         | ∞†                  |
|                    | 0/8,109                                                         | 10,078/10,357                                                |                     |

CI = confidence interval; mRDT = malaria rapid diagnostic test; NA = not applicable.

\* Afgh1 and Ghan1 studies individually randomized patients to malaria diagnostic method and are not included in this analysis.

† Odds ratio undefined; approaches infinity.

‡ Cam1/a and Cam1/b each had two interventions: (R1) mRDTs supplied with basic training, and (R2) mRDTs supplied with enhanced training.

§ Nige1 had three interventions: (R1) mRDTs supplied with basic training, (R2) mRDTs supplied with enhanced training, and (R3) mRDTs supplied with enhanced training plus school-based activities.

|| Tanz2 had three interventions: (R1) mRDTs supplied with basic training, (R2) mRDTs supplied with enhanced training, and (R3) mRDTs supplied with enhanced training plus patient sensitization.

SUPPLEMENTAL TABLE 2  
Patients under age 5 years tested by any malaria diagnostic test

| Study (by setting) | Without mRDT interventions       |  | With mRDT interventions          |  | Odds ratio (95% CI) |
|--------------------|----------------------------------|--|----------------------------------|--|---------------------|
|                    | Percentage numerator/denominator |  | Percentage numerator/denominator |  |                     |
| Afgh1/a*           | NA                               |  | NA                               |  | NA                  |
| Afgh1/b*           | NA                               |  | NA                               |  | NA                  |
| Afgh1/c*           | NA                               |  | NA                               |  | NA                  |
| Afgh2/a            | 0.0                              |  | 100.0                            |  | ∞†                  |
|                    | 0/47                             |  | 76/76                            |  |                     |
| Afgh2/b            | 0.0                              |  | 100.0                            |  | ∞†                  |
|                    | 0/20                             |  | 15/15                            |  |                     |
| Cam1/a‡            | 85.2                             |  | (1): 64.4                        |  | (1): 0.32           |
|                    | 109/128                          |  | 116/680                          |  | (0.04, 2.42)        |
|                    |                                  |  | (2): 81.2                        |  | (2): 0.75           |
|                    |                                  |  | 190/234                          |  | (0.12, 4.7)         |
| Cam1/b‡            | 85.2                             |  | (1): 84.0                        |  | (1): 0.91           |
|                    | 92/108                           |  | 352/419                          |  | (0.18, 4.7)         |
|                    |                                  |  | (2): 77.4                        |  | (2): 0.60           |
|                    |                                  |  | 291/376                          |  | (0.09, 3.85)        |
| Ghan1/a*           | NA                               |  | NA                               |  | NA                  |
| Ghan1/b*           | NA                               |  | NA                               |  | NA                  |
| Nige1§             | 2.0                              |  | (1): 32.8                        |  | (1): 23.8           |
|                    | 6/299                            |  | 38/116                           |  | (5.46, 103)         |
|                    |                                  |  | (2): 30.9                        |  | (2): 21.9           |
|                    |                                  |  | 43/139                           |  | (4.96, 96.5)        |
|                    |                                  |  | (3): 27.7                        |  | (3): 18.7           |
|                    |                                  |  | 38/137                           |  | (3.27, 107)         |
| Tanz1/a            | 3.5                              |  | 50.4                             |  | 28.4                |
|                    | 14/405                           |  | 259/514                          |  | (7.9, 102)          |
| Tanz1/b            | 10.7                             |  | 40.5                             |  | 5.7                 |
|                    | 33/308                           |  | 100/247                          |  | (2.41, 13.3)        |
| Tanz1/c            | 32.2                             |  | 72.2                             |  | 5.48                |
|                    | 103/320                          |  | 268/371                          |  | (2.16, 13.9)        |
| Tanz2              | 0.0                              |  | (1): 37.7                        |  | ∞†                  |
|                    | 0/6,559                          |  | 1,981/5,270                      |  | -                   |
|                    | -                                |  | (2): 38.5                        |  | -                   |
|                    | -                                |  | 2,346/6,101                      |  | -                   |
|                    | -                                |  | (3): 39.1                        |  | -                   |
|                    | -                                |  | 1,820/4,649                      |  | -                   |
| Uga1               | 8.9                              |  | 61.0                             |  | 16.0                |
|                    | 5,774/64,825                     |  | 40,978/67,159                    |  | (6.1, 42)           |
| Uga2/a             | 0.0                              |  | 96.0                             |  | ∞†                  |
|                    | 0/2,444                          |  | 1,150/1,198                      |  |                     |
| Uga2/b             | 0.0                              |  | 98.7                             |  | ∞†                  |
|                    | 0/10,625                         |  | 7,736/1,198                      |  |                     |
| Uga3               | 0.0                              |  | 98.3                             |  | ∞†                  |
|                    | 0/2,761                          |  | 3,829/3,895                      |  |                     |

CI = confidence interval; mRDT = malaria rapid diagnostic test; NA = not applicable.

\* Afgh1 and Ghan1 studies individually randomized patients to malaria diagnostic method and are not included in this analysis.

† Odds ratio undefined; approaches infinity.

‡ Cam1/a and Cam1/b each had two interventions: (R1) mRDTs supplied with basic training, and (R2) mRDTs supplied with enhanced training.

§ Nige1 had three interventions: (R1) mRDTs supplied with basic training, (R2) mRDTs supplied with enhanced training, and (R3) mRDTs supplied with enhanced training plus school-based activities.

|| Tanz2 had three interventions: (R1) mRDTs supplied with basic training, (R2) mRDTs supplied with enhanced training, and (R3) mRDTs supplied with enhanced training plus patient sensitization.

SUPPLEMENTAL TABLE 3  
Patients ages 5 years and older tested by any malaria diagnostic test

| Study (by setting) | Without mRDT interventions       | With mRDT interventions          | Odds ratio (95% CI) |
|--------------------|----------------------------------|----------------------------------|---------------------|
|                    | Percentage numerator/denominator | Percentage numerator/denominator |                     |
| Afgh1/a*           | NA                               | NA                               | NA                  |
| Afgh1/b*           | NA                               | NA                               | NA                  |
| Afgh1/c*           | NA                               | NA                               | NA                  |
| Afgh2/a            | 0.0                              | 98.6                             | ∞†                  |
|                    | 0/558                            | 633/642                          |                     |
| Afgh2/b            | 0.0                              | 100.0                            | ∞†                  |
|                    | 0/573                            | 449/449                          |                     |
| Cam1/a‡            | 75.0                             | (1): 72.8                        | (1): 0.89           |
|                    | 204/272                          | 378/519                          | (0.28, 2.90)        |
|                    | –                                | (2): 78.8                        | (2): 1.24           |
|                    | –                                | 427/542                          | (0.37, 4.1)         |
| Cam1/b‡            | 77.5                             | (1): 78.6                        | (1): 1.07           |
|                    | 134/173                          | 403/513                          | (0.24, 4.7)         |
|                    | –                                | (2): 78.2                        | (2): 1.04           |
|                    | –                                | 401/513                          | (0.20, 5.5)         |
| Ghan1/a*           | NA                               | NA                               | NA                  |
| Ghan1/b*           | NA                               | NA                               | NA                  |
| Nige1§             | 1.5                              | (1): 29.5                        | (1): 26.9           |
|                    | 20/1,306                         | 424/1,438                        | (7.3, 99)           |
|                    | –                                | (2): 22.3                        | (2): 18.5           |
|                    | –                                | 375/1,679                        | (4.8, 71)           |
|                    | –                                | (3): 14.3                        | (3): 10.7           |
|                    | –                                | 191/1,336                        | (2.85, 40)          |
| Tanz1/a            | 12.7                             | 44.1                             | 5.4                 |
|                    | 36/284                           | 104/236                          | (1.77, 16.6)        |
| Tanz1/b            | 15.1                             | 47.9                             | 5.1                 |
|                    | 38/251                           | 67/140                           | (1.92, 13.8)        |
| Tanz1/c            | 29.8                             | 70.1                             | 5.5                 |
|                    | 53/178                           | 141/201                          | (2.21, 13.9)        |
| Tanz2              | 0.0                              | (1): 40.0                        | ∞†                  |
|                    | 0/9,429                          | 3,572/8,926                      | –                   |
|                    | –                                | (2): 40.6                        | –                   |
|                    | –                                | 3,975/9,787                      | –                   |
|                    | –                                | (3): 41.4                        | –                   |
|                    | –                                | 3,849/9,301                      | –                   |
| Uga1               | 6.5                              | 49.9                             | 14.4                |
|                    | 9,298/143,834                    | 74,313/148,980                   | (6.23, 33.3)        |
| Uga2/a             | NA                               | NA                               | NA                  |
| Uga2/b             | NA                               | NA                               | NA                  |
| Uga3               | 0.0                              | 96.7                             | ∞†                  |
|                    | 0/5,625                          | 6,156/6,369                      |                     |

CI = confidence interval; mRDT = malaria rapid diagnostic test; NA = not applicable.

\* Afgh1 and Ghan1 studies individually randomized patients to malaria diagnostic method and are not included in this analysis.

† Odds ratio undefined; approaches infinity.

‡ Cam1/a and Cam1/b each had two interventions: (R1) mRDTs supplied with basic training, and (R2) mRDTs supplied with enhanced training.

§ Nige1 had three interventions: (R1) mRDTs supplied with basic training, (R2) mRDTs supplied with enhanced training, and (R3) mRDTs supplied with enhanced training plus school-based activities.

|| Tanz2 had three interventions: (R1) mRDTs supplied with basic training, (R2) mRDTs supplied with enhanced training, and (R3) mRDTs supplied with enhanced training plus patient sensitization.

SUPPLEMENTAL TABLE 4  
Patients prescribed ACT

| Study (by setting) | Without mRDT interventions       | With mRDT interventions          | Odds ratio (95% CI)       |
|--------------------|----------------------------------|----------------------------------|---------------------------|
|                    | Percentage numerator/denominator | Percentage numerator/denominator |                           |
| Afgh1/a            | 42.0<br>843/2,005                | 36.1<br>740/2,048                | 0.78<br>(0.68, 0.90)      |
| Afgh1/b            | 24.4<br>126/517                  | 20.1<br>106/527                  | 0.78<br>(0.54, 1.13)      |
| Afgh1/c            | 87.6<br>283/323                  | 34.7<br>114/329                  | 0.07<br>(0.02, 0.25)      |
| Afgh2/a            | 77.9<br>471/605                  | 26.6<br>188/708                  | 0.10<br>(0.04, 0.25)      |
| Afgh2/b            | 95.9<br>567/591                  | 0.6<br>3/463                     | 0.00<br>(0.00, 0.00)      |
| Cam1/a*            | 79.5<br>314/395                  | (1): 43.5<br>294/676             | (1): 0.20<br>(0.06, 0.61) |
|                    | –                                | (2): 37.9<br>286/754             | (2): 0.16<br>(0.05, 0.52) |
| Cam1/b*            | 69.8<br>194/278                  | (1): 55.1<br>496/900             | (1): 0.53<br>(0.28, 1.02) |
|                    | –                                | (2): 46.5<br>408/877             | (2): 0.38<br>(0.17, 0.84) |
| Ghan1/a            | 63.7<br>1,210/1,900              | 62.3<br>1,180/1,893              | 0.94<br>(0.83, 1.08)      |
| Ghan1/b            | 91.6<br>1,577/1,722              | 69.0<br>1,188/1,721              | 0.20<br>(0.07, 0.62)      |
| Nige1†             | 56.9<br>934/1,642                | (1): 49.3<br>717/1,453           | (1): 0.74<br>(0.40, 1.35) |
|                    | –                                | (2): 45.4<br>828/1,823           | (2): 0.63<br>(0.38, 1.03) |
|                    | –                                | (3): 54.2<br>808/1,409           | (3): 0.90<br>(0.51, 1.57) |
| Tanz1/a‡           | 20.1<br>138/688                  | 8.5<br>64/750                    | 0.37<br>(0.17, 0.79)      |
| Tanz1/b‡           | 49.2<br>275/559                  | 25.5<br>99/388                   | 0.35<br>(0.20, 0.61)      |
| Tanz1/c‡           | 57.0<br>284/498                  | 35.1<br>201/572                  | 0.41<br>(0.24, 0.68)      |
| Tanz2§             | 43.6<br>7,008/16,068             | (1): 15.8<br>2,246/14,217        | (1): 0.24<br>(0.15, 0.40) |
|                    | –                                | (2): 11.6<br>1,846/15,931        | (2): 0.17<br>(0.10, 0.28) |
|                    | –                                | (3): 9.5<br>1,329/13,973         | (3): 0.14<br>(0.08, 0.22) |
| Uga1               | 53.8<br>113,411/210,758          | 50.8<br>112,673/221,755          | 0.89<br>(0.67, 1.19)      |
| Uga2/a             | 95.1<br>2,310/2,428              | 8.2<br>94/1,149                  | 0.00<br>(0.00, 0.01)      |
| Uga2/b             | 99.2<br>10,500/10,589            | 45.7<br>3,512/7,677              | 0.01<br>(0.00, 0.01)      |
| Uga3               | 99.1<br>7,981/8,055              | 60.0<br>5,933/9,987              | 0.01<br>(0.01, 0.04)      |

CI = confidence interval; mRDT = malaria rapid diagnostic test; NA = not applicable. Table presents the percentage of patients prescribed artemisinin-based combination therapy (ACT) except for: Afgh1 and Afgh2, where the percentage prescribed all antimalarials is presented to account for *Plasmodium vivax* treatment; and Nige1 without mRDT interventions only, where ACT or sulfadoxine-pyrimethamine (SP) is presented to reflect treatment practices at the time of data collection.

\* Cam1/a and Cam1/b each had two interventions: (R1) mRDTs supplied with basic training, and (R2) mRDTs supplied with enhanced training.

† Nige1 had three interventions: (R1) mRDTs supplied with basic training, (R2) mRDTs supplied with enhanced training, and (R3) mRDTs supplied with enhanced training plus school-based activities.

‡ ACTs obtained by patient at the consultation (ACTs prescribed not available).

§ Tanz2 had three interventions: (R1) mRDTs supplied with basic training, (R2) mRDTs supplied with enhanced training, and (R3) mRDTs supplied with enhanced training plus patient sensitization.

SUPPLEMENTAL TABLE 5  
Patients in scenarios with mRDT interventions prescribed ACT, by malaria test result and not tested

| Study (by setting) | Percentage patients prescribed an ACT (95% CI) numerator/denominator                                                  |                                                                                                             |                                                                                                                   |
|--------------------|-----------------------------------------------------------------------------------------------------------------------|-------------------------------------------------------------------------------------------------------------|-------------------------------------------------------------------------------------------------------------------|
|                    | Positive test result                                                                                                  | Negative test result                                                                                        | Not tested                                                                                                        |
| Afgh1/a*†‡         | 99.5 (97.9, 99.9)<br>552/555                                                                                          | 12.6 (5.1, 27.7)<br>188/1,493                                                                               | NA                                                                                                                |
| Afgh1/b*†‡         | –                                                                                                                     | 19.2 (1.7, 76.0)<br>100/521                                                                                 | NA                                                                                                                |
| Afgh1/c*†‡         | –                                                                                                                     | 34.5 (8.4, 75.1)<br>113/328                                                                                 | NA                                                                                                                |
| Afgh2/a*‡          | 82.7 (63.3, 93.0)<br>163/197                                                                                          | 4.0 (1.7, 9.2)<br>20/503                                                                                    | –                                                                                                                 |
| Afgh2/b*‡          | –                                                                                                                     | 0.4 (0.1, 1.3)<br>2/459                                                                                     | –                                                                                                                 |
| Cam1/a§            | (1): 70.2 (37.3, 90.3)<br>33/47<br>(2): 79.6 (62.1, 90.3)<br>117/147                                                  | (1): 39.2 (13.4, 72.8)<br>167/426<br>(2): 24.6 (7.4, 57.2)<br>110/447                                       | (1): 45.2 (28.7, 62.7)<br>89/197<br>(2): 35.3 (6.1, 82.0)<br>54/153                                               |
| Cam1/b§            | (1): 72.4 (58.2, 83.1)<br>254/351<br>(2): 70.1 (54.6, 82.0)<br>246/351                                                | (1): 42.5 (29.3, 56.9)<br>157/369<br>(2): 18.3 (8.8, 34.2)<br>57/312                                        | (1): 48.5 (40.5, 56.6)<br>81/167<br>(2): 51.6 (28.6, 73.9)<br>99/192                                              |
| Ghan1/a†           | 98.2 (96.7, 99.0)<br>584/595                                                                                          | 45.9 (43.2, 48.6)<br>596/1,298                                                                              | (1): 45.0 (29.1, 61.9)<br>453/1,007<br>(2): 48.2 (38.3, 58.2)<br>674/1,399<br>(3): 56.9 (46.1, 67.1)<br>710/1,248 |
| Ghan1/b†           | 97.5 (88.0, 99.5)<br>692/710                                                                                          | 49.1 (1.0, 98.9)<br>496/1,011                                                                               | NA                                                                                                                |
| Nige1              | (1): 74.4 (68.3, 79.6)<br>238/320<br>(2): 66.9 (48.4, 81.3)<br>95/142<br>(3): 60.2 (40.3, 77.2)<br>59/98              | (1): 21.4 (10.3, 39.3)<br>24/112<br>(2): 21.6 (10.8, 38.5)<br>59/273<br>(3): 26.5 (11.3, 50.4)<br>36/136    | NA                                                                                                                |
| Tanz1/a¶           | 18.2 (7.0, 39.7)<br>14/77                                                                                             | 4.9 (2.5, 9.6)<br>14/283                                                                                    | 9.3 (4.9, 17.1)<br>36/387                                                                                         |
| Tanz1/b¶           | 94.4 (56.6, 99.5)<br>17/18                                                                                            | 13.4 (8.1, 21.4)<br>20/149                                                                                  | 28.2 (18.3, 40.8)<br>62/220                                                                                       |
| Tanz1/c¶           | 68.2 (53.4, 80.1)<br>131/192                                                                                          | 5.1 (1.9, 12.9)<br>11/217                                                                                   | 36.2 (17.3, 60.7)<br>59/163                                                                                       |
| Tanz2#             | (1): 78.8 (64.6, 88.3)<br>1,146/1,455<br>(2): 80.2 (65.2, 89.8)<br>1,361/1,696<br>(3): 75.6 (50.3, 90.4)<br>944/1,249 | (1): 17.0 (10.7, 26.0)<br>685/4,024<br>(2): 4.2 (1.8, 9.7)<br>191/4,541<br>(3): 3.6 (1.6, 8.2)<br>157/4,332 | (1): 4.6 (2.2, 9.6)<br>401/8,660<br>(2): 3.0 (1.2, 7.0)<br>286/9,599<br>(3): 2.6 (1.2, 5.7)<br>218/8,299          |
| Uga1               | 93.2 (89.7, 95.5)<br>75,808/81,359                                                                                    | 2.7 (2.1, 3.5)<br>977/35,711                                                                                | 34.2 (23.1, 47.3)<br>35,717/104,405                                                                               |
| Uga2/a             | 66.7 (41.7, 84.8)<br>24/36                                                                                            | 3.1 (1.4, 6.4)<br>32/1,041                                                                                  | 69.6 (48.7, 84.6)<br>32/46                                                                                        |
| Uga2/b             | 98.0 (96.9, 98.7)<br>3,318/3,385                                                                                      | 1.1 (0.6, 1.8)<br>43/4,067                                                                                  | 93.1 (80.4, 97.8)<br>95/102                                                                                       |
| Uga3               | 97.9 (96.5, 98.7)<br>5,551/5,670                                                                                      | 1.2 (0.8, 1.9)<br>47/3,868                                                                                  | 96.4 (91.4, 98.5)<br>269/279                                                                                      |

ACT = artemisinin-based combination therapy; CI = confidence interval; mRDT = malaria rapid diagnostic tests; NA = not applicable.

\* Table presents the percentage of patients in scenarios with mRDT interventions prescribed ACT except for Afgh1 and Afgh2, where the percentage prescribed all antimalarials is presented to account for *Plasmodium vivax* treatment.

† Patients in the Afgh1 and Ghan1 studies were individually randomized to malaria diagnostic method; data are not included in this analysis because all patients in scenarios with mRDT interventions were tested.

‡ Data not included in the analysis when denominators were less than 10.

§ Cam1/a and Cam1/b each had two interventions: (R1) mRDTs supplied with basic training, and (R2) mRDTs supplied with enhanced training.

|| Nige1 had three interventions: (R1) mRDTs supplied with basic training, (R2) mRDTs supplied with enhanced training, and (R3) mRDTs supplied with enhanced training plus school-based activities.

¶ ACTs obtained by patient at the consultation; data on ACTs prescribed not available in Tanz1.

# Tanz2 had three interventions: (R1) mRDTs supplied with basic training, (R2) mRDTs supplied with enhanced training, and (R3) mRDTs supplied with enhanced training plus patient sensitization.

SUPPLEMENTAL TABLE 6  
Patients prescribed a systemic antibacterial

| Study (by setting) | Without mRDT interventions       |                                  | With mRDT interventions          |                                  | Odds ratio (95% CI) |
|--------------------|----------------------------------|----------------------------------|----------------------------------|----------------------------------|---------------------|
|                    | Percentage numerator/denominator | Percentage numerator/denominator | Percentage numerator/denominator | Percentage numerator/denominator |                     |
| Afgh1/a            | 38.1                             |                                  | 40.8                             |                                  | 1.12                |
|                    | 763/2,005                        |                                  | 836/2,048                        |                                  | (0.97, 1.03)        |
| Afgh1/b            | 73.3                             |                                  | 78.9                             |                                  | 1.36                |
|                    | 379/517                          |                                  | 416/527                          |                                  | (0.76, 2.43)        |
| Afgh1/c            | 14.2                             |                                  | 57.1                             |                                  | 8.0                 |
|                    | 46/323                           |                                  | 188/329                          |                                  | (2.70, 23.9)        |
| Afgh2/a            | 18.2                             |                                  | 54.1                             |                                  | 5.3                 |
|                    | 110/605                          |                                  | 383/708                          |                                  | (2.28, 12.4)        |
| Afgh2/b            | 48.4                             |                                  | 68.5                             |                                  | 2.32                |
|                    | 286/591                          |                                  | 317/463                          |                                  | (0.85, 6.3)         |
| Cam1/a*            | 72.8                             |                                  | (1): 78.5                        |                                  | (1): 1.36           |
|                    | 287/394                          |                                  | 534/680                          |                                  | (0.68, 2.84)        |
|                    | –                                |                                  | (2): 78.5                        |                                  | (2): 1.36           |
|                    | –                                |                                  | 595/757                          |                                  | (0.76, 2.43)        |
| Cam1/b*            | 50.4                             |                                  | (1): 56.9                        |                                  | (1): 1.30           |
|                    | 140/278                          |                                  | 510/897                          |                                  | (0.48, 3.53)        |
|                    | –                                |                                  | (2): 47.3                        |                                  | (2): 0.89           |
|                    | –                                |                                  | 415/877                          |                                  | (0.35, 2.27)        |
| Ghan1/a            | 30.8                             |                                  | 32.1                             |                                  | 1.06                |
|                    | 586/1,900                        |                                  | 608/1,896                        |                                  | (0.92, 1.21)        |
| Ghan1/b            | 28.0                             |                                  | 32.6                             |                                  | 1.24                |
|                    | 483/1,723                        |                                  | 560/1,719                        |                                  | (0.90, 1.72)        |
| Nige1†             | 23.2                             |                                  | (1): 13.6                        |                                  | (1): 0.52           |
|                    | 382/1,642                        |                                  | 199/1,467                        |                                  | (0.29, 0.93)        |
|                    | –                                |                                  | (2): 18.2                        |                                  | (2): 0.73           |
|                    | –                                |                                  | 330/1,817                        |                                  | (0.46, 1.17)        |
|                    | –                                |                                  | (3): 15.1                        |                                  | (3): 0.59           |
|                    | –                                |                                  | 223/1,474                        |                                  | (0.34, 1.03)        |
| Tanz1/a‡           | 29.7                             |                                  | 44.7                             |                                  | 1.92                |
|                    | 204/688                          |                                  | 335/749                          |                                  | (1.20, 3.08)        |
| Tanz1/b‡           | 35.2                             |                                  | 56.4                             |                                  | 2.38                |
|                    | 197/688                          |                                  | 219/388                          |                                  | (1.54, 3.68)        |
| Tanz1/c‡           | 33.1                             |                                  | 49.0                             |                                  | 1.94                |
|                    | 165/498                          |                                  | 280/572                          |                                  | (1.32, 3.83)        |
| Tanz24§            | 61.5                             |                                  | (1): 73.2                        |                                  | (1): 1.71           |
|                    | 9,875/16,068                     |                                  | 10,407/14,217                    |                                  | (1.25, 2.35)        |
|                    | –                                |                                  | (2): 75.4                        |                                  | (2): 1.92           |
|                    | –                                |                                  | 12,014/15,931                    |                                  | (1.42, 2.61)        |
|                    | –                                |                                  | (3): 70.5                        |                                  | (3): 1.50           |
|                    | –                                |                                  | 9,853/13,973                     |                                  | (1.19, 1.89)        |
| Uga1               | 53.7                             |                                  | 57.9                             |                                  | 1.18                |
|                    | 113,102/210,758                  |                                  | 128,406/221,755                  |                                  | (0.79, 1.77)        |
| Uga2/a             | NA                               |                                  | NA                               |                                  | NA                  |
| Uga2/b             | NA                               |                                  | NA                               |                                  | NA                  |
| Uga3               | 19.4                             |                                  | 34.9                             |                                  | 2.24                |
|                    | 48/248                           |                                  | 87/249                           |                                  | (1.41, 3.54)        |

CI = confidence interval; mRDT = malaria rapid diagnostic test; NA = not applicable.

\* Cam1/a and Cam1/b each had two interventions: (R1) mRDTs supplied with basic training, and (R2) mRDTs supplied with enhanced training.

† Nige1 had three interventions: (R1) mRDTs supplied with basic training, (R2) mRDTs supplied with enhanced training, and (R3) mRDTs supplied with enhanced training plus school-based activities.

‡ Any antibacterials obtained by patients at the consultation; data on systemic antibacterials prescribed not available in Tanz1.

§ Tanz2 had three interventions: (R1) mRDTs supplied with basic training, (R2) mRDTs supplied with enhanced training, and (R3) mRDTs supplied with enhanced training plus patient sensitization.

|| Community health workers in Uga2 were not permitted to prescribe antibacterials medicines, so this study is not included in this analysis.

SUPPLEMENTAL TABLE 7

Patients in scenarios with mRDT interventions prescribed a systemic antibacterial, by malaria test result and not tested

| Study (by setting) | Percentage prescribed an antibacterial (95% CI) numerator/denominator                                             |                                                                                                                         |                                                                                                                         |
|--------------------|-------------------------------------------------------------------------------------------------------------------|-------------------------------------------------------------------------------------------------------------------------|-------------------------------------------------------------------------------------------------------------------------|
|                    | Positive test result                                                                                              | Negative test result                                                                                                    | Not tested                                                                                                              |
| Aghg1/a*           | 3.6 (1.8, 7.1)<br>20/555                                                                                          | 54.7 (37.9, 70.4)<br>816/1,493                                                                                          | NA                                                                                                                      |
| Afgh1/b*†          | –                                                                                                                 | 70.7 (60.0, 91.1)<br>415/521                                                                                            | NA                                                                                                                      |
| Afgh1/c*†          | –                                                                                                                 | 57.3 (23.0, 85.8)<br>188/328                                                                                            | NA                                                                                                                      |
| Afgh2/a†           | 8.1 (4.8, 13.5)<br>16/197                                                                                         | 72.8 (49.9, 87.8)<br>366/503                                                                                            | –                                                                                                                       |
| Afgh2/b†           | –                                                                                                                 | 68.8 (41.9, 87.1)<br>316/459                                                                                            | –                                                                                                                       |
| Cam1/a‡            | (1): 66.0 (48.2, 80.1)<br>31/47<br>(2): 74.7 (65.3, 82.2)<br>109/146                                              | (1): 79.9 (65.9, 89.1)<br>341/427<br>(2): 83.1 (75.4, 88.9)<br>375/451                                                  | (1): 80.0 (57.5, 92.2)<br>160/200<br>(2): 69.3 (64.6, 73.6)<br>106/153                                                  |
| Cam1/b‡            | (1): 58.0 (42.4, 72.2)<br>203/350<br>(2): 43.7 (31.7, 56.5)<br>153/350                                            | (1): 63.5 (46.9, 77.4)<br>203/350<br>(2): 52.6 (45.1, 60.0)<br>164/312                                                  | (1): 42.5 (25.2, 61.9)<br>71/167<br>(2): 47.9 (28.2, 68.3)<br>92/192                                                    |
| Ghan1/a*           | 14.6 (12.0, 17.7)<br>87/595                                                                                       | 40.0 (37.4, 42.7)<br>521/1,301                                                                                          | NA                                                                                                                      |
| Ghan1/b*           | 18.0 (11.1, 27.9)<br>128/710                                                                                      | 42.8 (12.4, 79.9)<br>432/1,009                                                                                          | NA                                                                                                                      |
| Nige1§             | (1): 17.5 (13.3, 22.7)<br>55/314<br>(2): 14.9 (8.5, 24.7)<br>21/141<br>(3): 20.2 (8.5, 41.0)<br>20/99             | (1): 26.1 (12.2, 47.4)<br>29/111<br>(2): 13.3 (6.7, 24.6)<br>37/279<br>(3): 21.6 (13.9, 32.2)<br>29/134                 | (1): 11.1 (5.6, 20.9)<br>114/1,026<br>(2): 19.5 (14.9, 25.2)<br>271/1,388<br>(3): 13.9 (8.9, 21.3)<br>172/1,233         |
| Tanz1/a            | 31.6 (17.3, 50.5)<br>24/76                                                                                        | 53.0 (42.2, 63.6)<br>150/283                                                                                            | 41.3 (30.4, 52.2)<br>160/387                                                                                            |
| Tanz1/b            | 44.4 (11.4, 83.3)<br>8/18                                                                                         | 58.4 (47.2, 68.8)<br>87/149                                                                                             | 56.4 (44.7, 67.4)<br>124/220                                                                                            |
| Tanz1/c            | 30.7 (20.8, 42.9)<br>59/192                                                                                       | 61.8 (50.4, 71.9)<br>134/217                                                                                            | 53.4 (39.4, 66.8)<br>87/163                                                                                             |
| Tanz2¶             | (1): 26.5 (13.4, 45.8)<br>386/1,455<br>(2): 36.1 (25.4, 48.3)<br>612/1,696<br>(3): 26.3 (18.0, 36.6)<br>328/1,249 | (1): 74.2 (67.1, 80.2)<br>2,985/4,024<br>(2): 77.7 (69.9, 83.9)<br>3,527/4,541<br>(3): 74.7 (69.2, 79.6)<br>3,238/4,332 | (1): 80.6 (75.5, 84.8)<br>6,979/6,880<br>(2): 81.3 (75.1, 86.2)<br>7,800/9,599<br>(3): 74.9 (68.6, 80.3)<br>6,214/8,299 |
| Uga1               | 40.5 (30.6, 51.2)<br>32,935/81,359                                                                                | 69.3 (65.3, 73.0)<br>24,737/35,711                                                                                      | 66.3 (60.5, 71.7)<br>69,178/104,405                                                                                     |
| Uga2/a#            | NA                                                                                                                | NA                                                                                                                      | NA                                                                                                                      |
| Uga2/b#            | NA                                                                                                                | NA                                                                                                                      | NA                                                                                                                      |
| Uga3†              | 23.6 (16.3, 33.0)<br>30/127                                                                                       | 46.0 (37.7, 54.6)<br>52/113                                                                                             | –                                                                                                                       |

CI = confidence interval; mRDT = malaria rapid diagnostic test; NA = not applicable.

\* Patients in the Afgh1 and Ghan1 studies were individually randomized to malaria diagnostic method; data are not included in this analysis because all patients in scenarios with mRDT interventions were tested.

† Data not included in the analysis when denominators were less than 10.

‡ Cam1/a and Cam1/b each had two interventions: (R1) mRDTs supplied with basic training, and (R2) mRDTs supplied with enhanced training.

§ Nige1 had three interventions: (R1) mRDTs supplied with basic training, (R2) mRDTs supplied with enhanced training, and (R3) mRDTs supplied with enhanced training plus school-based activities.

|| Any antibacterials obtained by patients at the consultation; data on systemic antibacterials prescribed not available in Tanz1.

¶ Tanz2 had three interventions: (R1) mRDTs supplied with basic training, (R2) mRDTs supplied with enhanced training, and (R3) mRDTs supplied with enhanced training plus patient sensitization.

# Community health workers in Uga2 were not permitted to prescribe antibacterials medicines, so this study is not included in this analysis.

SUPPLEMENTAL TABLE 8  
Patients prescribed an antimalarial and an antibacterial

| Study (by setting) | Without mRDT interventions       | With mRDT interventions          | Odds ratio (95% CI)    |
|--------------------|----------------------------------|----------------------------------|------------------------|
|                    | Percentage numerator/denominator | Percentage numerator/denominator |                        |
| Afgh1/a            | 1.2<br>25/2,005                  | 1.5<br>30/2,048                  | 1.18 (0.66, 2.11)      |
| Afgh1/b            | 10.6<br>55/517                   | 8.7<br>46/527                    | 0.80 (0.54, 1.19)      |
| Afgh1/c            | 4.6<br>15/323                    | 4.3<br>14/329                    | 0.91 (0.50, 1.68)      |
| Afgh2/a            | 47.4<br>280/51                   | 0.2<br>1/463                     | 0.00 (0.00, 0.02)      |
| Afgh2/b            | 16.7<br>101/605                  | 3.1<br>22/708                    | 0.16 (0.06, 0.40)      |
| Cam1/a*            | 66.1<br>259/392                  | (1): 37.7<br>253/672             | (1): 0.31 (0.15, 0.65) |
|                    | –                                | (2): 32.8<br>247/753             | (2): 0.25 (0.10, 0.61) |
| Cam2/b*            | 43.9<br>122/278                  | (1): 40.1<br>359/896             | (1): 0.85 (0.33, 2.24) |
|                    | –                                | (2): 28.1<br>247/875             | (2): 0.50 (0.19, 1.31) |
| Ghan1/a            | 12.3<br>234/1,899                | 12.4<br>235/1,893                | 1.01 (0.83, 1.22)      |
| Ghan1/b            | 23.8<br>410/1,722                | 15.3<br>263/1,719                | 0.58 (0.32, 1.04)      |
| Nige1†             | 14.7<br>241/1,642                | (1): 12.3<br>174/1,459           | (1): 0.81 (0.48, 1.39) |
|                    | –                                | (2): 14.0<br>253/1,805           | (2): 0.95 (0.58, 1.55) |
|                    | –                                | (3): 11.9<br>175/1,472           | (3): 0.78 (0.51, 1.21) |
| Tanz1/a‡           | 6.8<br>47/688                    | 4.1<br>31/749                    | 0.59 (0.27, 1.28)      |
| Tanz1/b‡           | 18.2<br>102/559                  | 12.9<br>50/388                   | 0.66 (0.36, 1.22)      |
| Tanz1/c‡           | 15.5<br>77/498                   | 14.7<br>84/572                   | 0.94 (0.49, 1.82)      |
| Tanz2§             | 24.2<br>3,891/16,068             | (1): 6.9<br>974/14,217           | (1): 0.23 (0.14, 0.37) |
|                    | –                                | (2): 5.7<br>908/15,931           | (2): 0.19 (0.12, 0.31) |
|                    | –                                | (3): 3.6<br>500/13,973           | (3): 0.12 (0.07, 0.19) |
| Uga1               | 23.8<br>50,098/210,758           | 23.5<br>52,212/221,755           | 0.99 (0.59, 1.65)      |
| Uga2/a             | NA                               | NA                               | NA                     |
| Uga2/b             | NA                               | NA                               | NA                     |
| Uga3               | 19.4<br>48/248                   | 14.2<br>33/233                   | 0.69 (0.45, 1.06)      |

CI = confidence interval; mRDT = malaria rapid diagnostic test; NA = not applicable.

\* Cam1/a and Cam1/b each had two interventions: (R1) mRDTs supplied with basic training, and (R2) mRDTs supplied with enhanced training.

† Nige1 had three interventions: (R1) mRDTs supplied with basic training, (R2) mRDTs supplied with enhanced training, and (R3) mRDTs supplied with enhanced training plus school-based activities.

‡ Antimalarials and any antibacterials obtained by patients at the consultation; data on medicines prescribed not available in Tanz1.

§ Tanz2 had three interventions: (R1) mRDTs supplied with basic training, (R2) mRDTs supplied with enhanced training, and (R3) mRDTs supplied with enhanced training plus patient sensitization.

|| Community health workers in Uga2 were not permitted to prescribe antibacterials medicines, so this study is not included in this analysis.



SUPPLEMENTAL TABLE 9  
Patients prescribed an antimalarial or an antibacterial

| Study (by setting) | Without mRDT interventions       | With mRDT interventions          | Odds ratio (95% CI)    |
|--------------------|----------------------------------|----------------------------------|------------------------|
|                    | Percentage numerator/denominator | Percentage numerator/denominator |                        |
| Afgh1/a            | 78.9<br>1,581/2,005              | 75.5<br>1,546/2,048              | 0.83 (0.74, 0.93)      |
| Afgh1/b            | 87.0<br>450/517                  | 90.3<br>476/527                  | 1.39 (0.73, 2.66)      |
| Afgh1/c            | 97.2<br>314/323                  | 87.5<br>288/329                  | 0.20<br>0.08, 0.48)    |
| Afgh2/a            | 97.0<br>573/591                  | 68.9<br>319/463                  | 0.07 (0.03, 0.19)      |
| Afgh2/b            | 79.3<br>480/605                  | 77.5<br>549/708                  | 0.90 (0.32, 2.56)      |
| Cam1/a*            | 94.2<br>372/394                  | (1): 92.5<br>629/680             | (1): 0.73 (0.19, 2.76) |
|                    | –                                | (2): 90.9<br>687/757             | (2): 0.59 (0.16, 2.14) |
| Cam1/b*            | 97.1<br>270/278                  | (1): 88.1<br>790/897             | (1): 0.22 (0.10, 0.49) |
|                    | –                                | (2): 79.8<br>700/877             | (2): 0.12 (0.05, 0.27) |
| Ghan1/a            | 82.9<br>1,575/1,899              | 82.2<br>1,557/1,894              | 0.95 (0.80, 1.12)      |
| Ghan1/b            | 97.0<br>1,670/1,722              | 85.7<br>1,501/1,719              | 0.21 (0.10, 0.48)      |
| Nige1†             | 84.5<br>1,369/1,642              | (1): 81.7<br>1,158/1,460         | (1): 0.82 (0.37, 1.79) |
|                    | –                                | (2): 80.4<br>1,451/1,805         | (2): 0.75 (0.41, 1.37) |
|                    | –                                | (3): 86.8<br>1,278/1,473         | (3): 1.20 (0.49, 2.93) |
| Tanz1/a‡           | 46.2<br>318/688                  | 52.7<br>395/749                  | 1.30 (0.81, 2.09)      |
| Tanz1/b‡           | 68.7<br>384/559                  | 70.4<br>273/388                  | 1.08 (0.61, 1.93)      |
| Tanz1/c‡           | 79.1<br>394/498                  | 72.2<br>413/572                  | 0.69 (0.40, 1.16)      |
| Tanz2§             | 87.9<br>14,125/16,068            | (1): 85.4<br>12,146/14,217       | (1): 0.81 (0.61, 1.08) |
|                    | –                                | (2): 84.4<br>13,446/15,931       | (2): 0.74 (0.55, 1.01) |
|                    | –                                | (3): 79.0<br>11,032/13,973       | (3): 0.52 (0.40, 0.66) |
| Uga1               | 85.5<br>180,106/210,758          | 87.0<br>192,831/221,755          | 1.13 (0.67, 1.91)      |
| Uga2/a             | NA                               | NA                               | NA                     |
| Uga2/b             | NA                               | NA                               | NA                     |
| Uga3               | 100.0<br>248/248                 | 78.7<br>188/239                  | 0.00¶                  |

CI = confidence interval; mRDT = malaria rapid diagnostic test; NA = not applicable.

\* Cam1/a and Cam1/b each had two interventions: (R1) mRDTs supplied with basic training, and (R2) mRDTs supplied with enhanced training.

† Nige1 had three interventions: (R1) mRDTs supplied with basic training, (R2) mRDTs supplied with enhanced training, and (R3) mRDTs supplied with enhanced training plus school-based activities.

‡ Antimalarials and any antibacterials obtained by patients at the consultation; data on medicines prescribed not available in Tanz1.

§ Tanz2 had three interventions: (R1) mRDTs supplied with basic training, (R2) mRDTs supplied with enhanced training, and (R3) mRDTs supplied with enhanced training plus patient sensitization.

|| Community health workers in Uga2 were not permitted to prescribe antibacterials medicines, so this study is not included in this analysis.

¶ Odds ratio undefined; approaches zero.

SUPPLEMENTAL TABLE 10  
Patients prescribed a systemic antihelminthic, and patients prescribed a systemic antifungal

| Study (by setting) | Antihelminthics                  |                                  | Antifungals                      |                                  |
|--------------------|----------------------------------|----------------------------------|----------------------------------|----------------------------------|
|                    | Without mRDT interventions       | With mRDT interventions          | Without mRDT interventions       | With mRDT interventions          |
|                    | Percentage numerator/denominator | Percentage numerator/denominator | Percentage numerator/denominator | Percentage numerator/denominator |
| Afgh1/a            | 0.5 (10/2,005)                   | 0.3 (7/2,048)                    | 0 (0/2,005)                      | 0 (0/2,048)                      |
| Afgh1/b            | 0.8 (4/517)                      | 0.8 (4/527)                      | 0 (0/517)                        | 0 (0/527)                        |
| Afgh1/c            | 0.0 (0/323)                      | 0.3 (1/329)                      | 0 (0/323)                        | 0 (0/329)                        |
| Afgh2/a*           | NA                               | NA                               | NA                               | NA                               |
| Afgh2/b*           | NA                               | NA                               | NA                               | NA                               |
| Cam1/a†            | 11.4 (45/394)                    | (1): 4.3 (29/680)                | 0.8 (3/394)                      | (1): 1.2 (8/680)                 |
|                    | –                                | (2): 8.5 (76/897)                | –                                | (2): 1.9 (17/897)                |
|                    | –                                |                                  | –                                |                                  |
| Cam1/b†            | 8.3 (23/278)                     | (1): 7.1 (54/757)                | 1.4(4/278)                       | (1): 0.4 (3/757)                 |
|                    |                                  | (2): 10.4 (91/877)               |                                  | (2): 2.6 (23/877)                |
| Ghan1/a            | 31.6 (600/1,900)                 | 33.3 (631/1,896)                 | 0.6 (11/1,900)                   | 0.7 (13/1,896)                   |
| Ghan1/b            | 8.6 (149/1,723)                  | 11.3 (195/1,719)                 | 0.1 (1/1,723)                    | 0.3 (6/1,719)                    |
| Nige1‡             | 2.0 (33/1,642)                   | (1): 0.3 (4/1,588)               | 0.1 (1/1642)                     | (1): 0 (0/1,588)                 |
|                    |                                  | (2): 0.3 (5/1,850)               |                                  | (2): 0 (0/1,850)                 |
|                    |                                  | (3): 1.3 (19/1,508)              |                                  | (3): 0 (0/1,508)                 |
| Tanz1/a§           | 1.7 (12/688)                     | 4.5 (34/749)                     | 0 (0/688)                        | 0 (0/749)                        |
| Tanz1/b§           | 3.2 (18/559)                     | 7.2 (28/388)                     | 0 (0/559)                        | 0 (0/388)                        |
| Tanz1/c§           | 2.2 (11/498)                     | 3.1 (18/572)                     | 0 (0/498)                        | 0 (0/572)                        |
| Tanz2*             | NA                               | (1) NA                           | NA                               | (1) NA                           |
|                    |                                  | (2) NA                           |                                  | (3) NA                           |
|                    |                                  | (4) NA                           |                                  | (2) NA                           |
| Uga1               | 14.6 (30,865/210,758)            | 16.1 (35,683/221,755)            | 0.1 (195/210,758)                | 0.1 (318/221,755)                |
| Uga2/a*            | NA                               | NA                               | NA                               | NA                               |
| Uga2/b*            | NA                               | NA                               | NA                               | NA                               |
| Uga3               | 4.0 (10/248)                     | 5.2 (13/249)                     | 0 (0/248)                        | 0 (0/249)                        |

mRDT = malaria rapid diagnostic test; NA = not applicable.

\* Data on systemic antihelminthics and antifungals prescribed were not collected from Afgh2, Tanz2, and Uga2.

† Cam1/a and Cam1/b each had two interventions: (R1) mRDTs supplied with basic training, and (R2) mRDTs supplied with enhanced training.

‡ Nige1 had three interventions: (R1) mRDTs supplied with basic training, (R2) mRDTs supplied with enhanced training, and (R3) mRDTs supplied with enhanced training plus school-based activities.

§ Systemic antihelminthics and antifungals obtained by patients at the consultation; data on medicines prescribed not available in Tanz1.

SUPPLEMENTAL TABLE 11  
Patients prescribed an antipyretic without an antimalarial or an antibiotic

| Study (by setting) | Without mRDT interventions       | With mRDT interventions          | Odds ratio (95% CI)    |
|--------------------|----------------------------------|----------------------------------|------------------------|
|                    | Percentage numerator/denominator | Percentage numerator/denominator |                        |
| Afgh1/a            | 19.7<br>395/2,005                | 22.7<br>464/2,048                | 1.19 (1.07, 1.34)      |
| Afgh1/b            | 10.8<br>56/517                   | 8.2<br>43/527                    | 0.73 (0.35, 1.53)      |
| Afgh1/c            | 2.8<br>9/323                     | 12.2<br>40/329                   | 4.8 (2.16, 10.8)       |
| Afgh2/a            | 1.2<br>7/591                     | 17.3<br>80/463                   | 17.4 (3.41, 89)        |
| Afgh2/b            | 0.3<br>2/605                     | 11.6<br>82/708                   | 39.5 (12.9, 121)       |
| Cam1/a*            | 0.5<br>2/392                     | (1): 4.2<br>28/671               | (1): 8.5 (1.34, 54)    |
|                    | –                                | (2): 7.1<br>53/749               | (2): 14.9 (2.44, 90)   |
|                    | –                                | (1): 3.7<br>33/895               | (1): 2.09 (0.66, 6.7)  |
| Cam1/b*            | 1.8<br>5/278                     | (1): 3.7<br>33/895               | (1): 2.09 (0.66, 6.7)  |
|                    | –                                | (2): 5.8<br>51/874               | (2): 3.38 (1.01, 11.4) |
|                    | –                                | (1): 3.7<br>33/895               | (1): 2.09 (0.66, 6.7)  |
| Ghan1/a            | 12.6<br>239/1,899                | 14.3<br>271/1,893                | 1.16 (0.96, 1.40)      |
| Ghan1/b            | 2.4<br>42/1,722                  | 10.2<br>176/1,719                | 4.6 (1.98, 10.5)       |
| Nige1†             | 7.6<br>138/1,642                 | (1): 3.1<br>44/1,459             | (1): 0.39 (0.17, 0.89) |
|                    | –                                | (2): 8.9<br>161/1,825            | (2): 1.19 (0.66, 2.13) |
|                    | –                                | (3): 3.9<br>58/1,489             | (3): 0.50 (0.18, 1.39) |
|                    | –                                | 18.8<br>141/749                  | 0.75 (0.46, 1.23)      |
|                    | –                                | 12.1<br>47/388                   | 0.95 (0.49, 1.83)      |
| Tanz1/a‡           | 23.7<br>163/688                  | 18.8<br>141/749                  | 0.75 (0.46, 1.23)      |
| Tanz1/b‡           | 12.7<br>71/559                   | 12.1<br>47/388                   | 0.95 (0.49, 1.83)      |
| Tanz1/c‡           | 9.4<br>47/498                    | 18.2<br>104/572                  | 2.13 (1.25, 3.64)      |
| Tanz2§             | 6.4<br>(1,020/15,953)            | (1): 10.9<br>1,545/14,217        | (1): 1.78 (1.32, 2.41) |
|                    | –                                | (2): 11.4<br>1,818/15,931        | (2): 1.89 (1.34, 2.65) |
|                    | –                                | (3): 14.1<br>1,964/13,973        | (3): 2.39 (1.89, 3.04) |
|                    | –                                | 8.4<br>18,630/221,755            | 0.79 (0.43, 1.45)      |
| Uga1               | 10.1<br>21,803/210,758           | 8.4<br>18,630/221,755            | 0.79 (0.43, 1.45)      |
| Uga2/a             | NA                               | NA                               | NA                     |
| Uga2/b             | NA                               | NA                               | NA                     |
| Uga3               | 0.0<br>0/248                     | 14.6<br>34/233                   | ∞¶                     |

CI = confidence interval; mRDT = malaria rapid diagnostic test; NA = not applicable.

\* Cam1/a and Cam1/b each had two interventions: (R1) mRDTs supplied with basic training, and (R2) mRDTs supplied with enhanced training.

† Nige1 had three interventions: (R1) mRDTs supplied with basic training, (R2) mRDTs supplied with enhanced training, and (R3) mRDTs supplied with enhanced training plus school-based activities.

‡ Antipyretics obtained by patients at the consultation; data on medicines prescribed not available in Tanz1.

§ Tanz2 had three interventions: (R1) mRDTs supplied with basic training, (R2) mRDTs supplied with enhanced training, and (R3) mRDTs supplied with enhanced training plus patient sensitization.

|| Community health workers in Uga2 were not permitted to prescribe antibacterials medicines, so this study is not included in this analysis.

¶ Odds ratio undefined; approaches infinity.

SUPPLEMENTAL TABLE 12  
Patients prescribed three or more medicines

| Study (by setting) | Without mRDT interventions       | With mRDT interventions          | Odds ratio (95% CI)           |
|--------------------|----------------------------------|----------------------------------|-------------------------------|
|                    | Percentage numerator/denominator | Percentage numerator/denominator |                               |
| Afgh1/a            | 16.1<br>322/2,005                | 15.1<br>309/2,048                | 0.93 (0.80, 1.08)             |
| Afgh1/b            | 36.0<br>186/517                  | 34.7<br>183/527                  | 0.95 (0.85, 1.06)             |
| Afgh1/c            | 60.1<br>194/323                  | 38.3<br>126/329                  | 0.41 (0.19, 0.92)             |
| Afgh2/a            | 62.3<br>368/591                  | 3.2<br>15/463                    | 0.02 (0.01, 0.05)             |
| Afgh2/b            | 28.1<br>170/605                  | 10.2<br>72/708                   | 0.29 (0.10, 0.88)             |
| Cam1/a*            | 87.5<br>350/400                  | (1): 82.3<br>575/699             | (1): 0.66 (0.28, 1.58)        |
|                    | –                                | (2): 79.8                        | (2): 0.57 (0.26, 1.22)        |
| Cam1/b*            | –                                | 621/778                          |                               |
|                    | 78.6<br>221/281                  | (1): 71.5<br>667/933             | (1): 0.68 (0.33, 1.41)        |
|                    | –                                | (2): 61.3                        | (2): 0.43 (0.19, 0.98)        |
|                    | –                                | 546/891                          |                               |
| Ghan1/a            | 91.8<br>(1,751/1,907)            | 91.4<br>(1,740/1,904)            | 0.95 (0.75, 1.19)             |
| Ghan1/b            | 90.3 (1,559/1,727)               | 88.2 (1,521/1,725)               | 0.80 (0.61, 1.07)             |
| Nige1†             | 60.8<br>965/1,587                | (1): 56.4<br>896/1,588           | (1): 0.83 (0.45, 1.54)        |
|                    | –                                | (2): 53.2                        | (2): 0.73 (0.39, 1.38)        |
|                    | –                                | 985/1,850                        |                               |
|                    | –                                | (3): 57.1                        | (3): 0.86 (0.51, 1.44)        |
|                    | –                                | 861/1,508                        |                               |
| Tanz1/a‡           | 13.8<br>95/688                   | 18.6<br>139/748                  | 1.42 (0.80, 2.53)             |
| Tanz1/b‡           | 24.2<br>143/498                  | 30.7<br>119/388                  | 1.39 (0.90, 2.14)             |
| Tanz1/c‡           | 28.7<br>143/498                  | 26.6<br>152/571                  | 0.90 (0.52, 1.57)             |
| Tanz2§             | NA                               | (1): NA<br>(2): NA<br>(3): NA    | (1): NA<br>(2): NA<br>(3): NA |
| Uga1               | 50.9<br>107,348/210,758          | 52.2<br>115,850/221,755          | 1.05 (0.66, 1.68)             |
| Uga2/a             | NA                               | NA                               | NA                            |
| Uga2/b             | NA                               | NA                               | NA                            |
| Uga3               | 54.0<br>134/248                  | 60.2<br>150/249                  | 1.29 (0.80, 2.07)             |

CI = confidence interval; mRDT = malaria rapid diagnostic test; NA = not applicable.

\* Cam1/a and Cam1/b each had two interventions: (R1) mRDTs supplied with basic training, and (R2) mRDTs supplied with enhanced training.

† Nige1 had three interventions: (R1) mRDTs supplied with basic training, (R2) mRDTs supplied with enhanced training, and (R3) mRDTs supplied with enhanced training plus school-based activities.

‡ Medicines obtained by patients at the consultation; data on medicines prescribed not available in Tanz1.

§ Tanz2 did not record data on all medications prescribed, so this study is not included in Figure 4D.

|| Community health workers in Uga2 were not permitted to prescribe antibacterials medicines, so this study is not included in this analysis.

SUPPLEMENTAL TABLE 13  
Patients referred to another care provider or health facility

| Study (by setting) | Without mRDT interventions       |  | With mRDT interventions          |  | Odds ratio (95% CI)     |
|--------------------|----------------------------------|--|----------------------------------|--|-------------------------|
|                    | Percentage numerator/denominator |  | Percentage numerator/denominator |  |                         |
| Afgh1/a            | 0.1                              |  | 0.0                              |  | 0.33 (0.03, 3.47)       |
|                    | 3/2,005                          |  | 1/2,048                          |  |                         |
| Afgh1/b            | 0.0                              |  | 0.0                              |  | –                       |
|                    | 0/323                            |  | 0/329                            |  |                         |
| Afgh1/c            | 0.2                              |  | 0.4                              |  | 1.97 (0.13, 29.1)       |
|                    | 1/517                            |  | 2/527                            |  |                         |
| Afgh2/a            | 29.0                             |  | 64.2                             |  | 4.4 (2.28, 8.5)         |
|                    | 172/594                          |  | 299/466                          |  |                         |
| Afgh2/b            | 23.9                             |  | 15.7                             |  | 0.59 (0.19, 1.81)       |
|                    | 145/607                          |  | 115/732                          |  |                         |
| Cam1*              | 0.8                              |  | (1): 0.9                         |  | (1): 1.15 (0.28, 4.7)   |
|                    | 3/399                            |  | 6/695                            |  | (2): 1.92 (0.47, 7.8)   |
|                    | –                                |  | 11/769                           |  |                         |
| Cam2*              | 0.4                              |  | (1): 1.3                         |  | (1): 3.76 (0.70, 20.1)  |
|                    | 1/280                            |  | 12/903                           |  | (2): 10.0 (1.38, 73)    |
|                    | –                                |  | (2): 3.5                         |  |                         |
|                    | –                                |  | 30/864                           |  |                         |
| Ghan1/a†           | NA                               |  | NA                               |  | NA                      |
| Ghan1/b†           | NA                               |  | NA                               |  | NA                      |
| Nige1‡             | 1.0                              |  | (1): 1.9                         |  | (1): 1.88 (0.59, 5.9)   |
|                    | 17/1,630                         |  | 30/1,548                         |  | (2): 1.63 (0.61, 4.4)   |
|                    | –                                |  | (2): 1.7                         |  |                         |
|                    | –                                |  | 31/1,833                         |  | (3): 3.77 (0.89, 15.93) |
|                    | –                                |  | (3): 3.8                         |  |                         |
|                    | –                                |  | 57/1,491                         |  |                         |
| Tanz1/a†           | NA                               |  | NA                               |  | NA                      |
| Tanz1/b†           | NA                               |  | NA                               |  | NA                      |
| Tanz1/c†           | NA                               |  | NA                               |  | NA                      |
| Tanz2†§            | NA                               |  | (1): NA                          |  | (1): NA                 |
|                    |                                  |  | (2): NA                          |  | (2): NA                 |
|                    |                                  |  | (3): NA                          |  | (3): NA                 |
| Uga1†              | NA                               |  | NA                               |  | NA                      |
| Uga2/b             | 1.0                              |  | 35.1                             |  | 52 (34.8, 77)           |
|                    | 109/10,599                       |  | 821/1,168                        |  |                         |
| Uga2/a             | 13.1                             |  | 70.3                             |  | 15.8 (9.3, 27)          |
|                    | 314/2,404                        |  | 2,706/77,16                      |  |                         |
| Uga3               | 3.5                              |  | 12.1                             |  | 3.82 (0.82, 17.8)       |
|                    | 279/8,039                        |  | 1,234/10,226                     |  |                         |

CI = confidence interval; mRDT = malaria rapid diagnostic test; NA = not applicable.

\* Cam1/a and Cam1/b each had two interventions: (R1) mRDTs supplied with basic training, and (R2) mRDTs supplied with enhanced training.

† Ghan1, Tanz1, Tanz2, and Uga1 did not record data on referral.

‡ Nige1 had three interventions: (R1) mRDTs supplied with basic training, (R2) mRDTs supplied with enhanced training, and (R3) mRDTs supplied with enhanced training plus school-based activities.

§ Tanz2 had three interventions: (R1) mRDTs supplied with basic training, (R2) mRDTs supplied with enhanced training, and (R3) mRDTs supplied with enhanced training plus patient sensitization.
